# Supplementary material for: Quantifying antibiotic impact on within-patient dynamics of extended-spectrum beta-lactamase resistance
Source: eLife journal article supplement (doi:10.7554/elife.49206), 2020-05-07
Supplement: repstand1 [file elife-49206-repstand1-v1.pdf]

Niehus et al. – STROBE guidelines [Von Elm et al., 2007]

| Item                 | Number | Recommendation                                                                                                                           | Addressed where                                                                                                                                                                        |
|----------------------|--------|------------------------------------------------------------------------------------------------------------------------------------------|----------------------------------------------------------------------------------------------------------------------------------------------------------------------------------------|
| Title and abstract   | 1a     | Indicate the study's design with a commonly used term in the title or the abstract                                                       | "prospective cohort study" ( <b>Abstract</b> )                                                                                                                                         |
|                      | 1b     | Provide in the abstract an informative and balanced summary of what was done and what was found                                          | see Abstract                                                                                                                                                                           |
| Introduction         |        |                                                                                                                                          |                                                                                                                                                                                        |
| Background/rationale | 2      | Explain the scientific background and rationale for the investigation being reported                                                     | see Introduction                                                                                                                                                                       |
| Objectives           | 3      | State specific objectives, including any prespecified hypotheses                                                                         | see Introduction                                                                                                                                                                       |
| Methods              |        |                                                                                                                                          |                                                                                                                                                                                        |
| Study design         | 4      | Present key elements of study design early in the paper                                                                                  | see "Patient cohort and treatment" and Table 1 ( <b>Results</b> )                                                                                                                      |
| Setting              | 5      | Describe the setting, locations, and relevant dates, including periods of recruitment, exposure, follow-up, and data collection          | see "Patient cohort and treatment" and Table 1 ( <b>Results</b> )                                                                                                                      |
| Participants         | 6a     | Give the eligibility criteria, and the sources and methods of selection of participants. Describe methods of follow-up                   | for eligibility criteria see Table 1, for follow-up methods see "Study participants and follow-up" ( <b>Methods and Materials</b> )                                                    |
|                      | 6b     | For matched studies, give matching criteria and number of exposed and unexposed                                                          | Not applicable                                                                                                                                                                         |
| Variables            | 7      | Clearly define all outcomes, exposures, predictors, potential confounders, and effect modifiers. Give diagnostic criteria, if applicable | Outcome and predictors explained in <b>Methods and Materials</b> . Distribution of patients' hospital origin, age & sex described in "Patient cohort and treatment" ( <b>Results</b> ) |

|                          |    |                                                                                                                                                                                                                                                                                                                                                                                             |                                                                                                                                                                                                                                                                                                                     |
|--------------------------|----|---------------------------------------------------------------------------------------------------------------------------------------------------------------------------------------------------------------------------------------------------------------------------------------------------------------------------------------------------------------------------------------------|---------------------------------------------------------------------------------------------------------------------------------------------------------------------------------------------------------------------------------------------------------------------------------------------------------------------|
|                          |    |                                                                                                                                                                                                                                                                                                                                                                                             | Diagnostic method of ESBL colonisation in “Identification of ESBL producing organisms carriers” ( <b>Methods and Materials</b> )                                                                                                                                                                                    |
| Data sources/measurement | 8  | For each variable of interest, give sources of data and details of methods of assessment (measurement). Describe comparability of assessment methods if there is more than one group                                                                                                                                                                                                        | “Study participants and follow-up” ( <b>Methods and Materials</b> ) explains source of antibiotic treatment data, and microbiological methods are given the two sections following                                                                                                                                  |
| Bias                     | 9  | Describe any efforts to address potential sources of bias                                                                                                                                                                                                                                                                                                                                   | Selection bias discussed in <b>Discussion and Conclusion</b>                                                                                                                                                                                                                                                        |
| Study size               | 10 | Explain how the study size was arrived at                                                                                                                                                                                                                                                                                                                                                   | Explained in “Study participants and follow-up” ( <b>Methods and Materials</b> )                                                                                                                                                                                                                                    |
| Quantitative variables   | 11 | Explain how quantitative variables were handled in the analyses. If applicable, describe which groupings were chosen and why                                                                                                                                                                                                                                                                | see <b>Methods and Materials</b> sections of the statistical methods                                                                                                                                                                                                                                                |
| Statistical methods      | 12 | <ul style="list-style-type: none"> <li>a) Describe all statistical methods, including those used to control for confounding</li> <li>b) Describe any methods used to examine subgroups and interactions</li> <li>c) Explain how missing data were addressed</li> <li>d) If applicable, explain how loss to follow-up was addressed</li> <li>e) Describe any sensitivity analyses</li> </ul> | Statistical methods described and justified in <b>Methods and Materials</b> . Potential for interactions between antibiotics discussed in <b>Discussion and Conclusion</b> . No missing data and no loss to follow-up. We describe model comparison in “Dynamic within-host model” ( <b>Methods and Materials</b> ) |
| Results                  |    |                                                                                                                                                                                                                                                                                                                                                                                             |                                                                                                                                                                                                                                                                                                                     |

|                  |     |                                                                                                                                                                                                          |                                                                                                                                                                              |
|------------------|-----|----------------------------------------------------------------------------------------------------------------------------------------------------------------------------------------------------------|------------------------------------------------------------------------------------------------------------------------------------------------------------------------------|
| Participants     | 13a | Report numbers of individuals at each stage of study—eg numbers potentially eligible, examined for eligibility, confirmed eligible, included in the study, completing follow-up, and analysed            | Number of total patients and patients consenting to follow-up given in “Patient cohort and treatment” <b>(Results)</b>                                                       |
|                  | 13b | Give reasons for non-participation at each stage                                                                                                                                                         | Reasons unknown                                                                                                                                                              |
|                  | 13c | Consider use of a flow diagram                                                                                                                                                                           | Deemed not necessary                                                                                                                                                         |
| Descriptive data | 14a | Give characteristics of study participants (eg demographic, clinical, social) and information on exposures and potential confounders                                                                     | Distribution of patients’ hospital origin, age and sex given in “Patient cohort and treatment” <b>(Results)</b>                                                              |
|                  | 14b | Indicate number of participants with missing data for each variable of interest                                                                                                                          | no missing data                                                                                                                                                              |
|                  | 14c | Summarise follow-up time (eg, average and total amount)                                                                                                                                                  | Median and maximum length of observation, and total number of observed days (with and without antibiotic treatment) given in “Patient cohort and treatment” <b>(Results)</b> |
| Outcome data     | 15  | Report numbers of outcome events or summary measures over time                                                                                                                                           | Raw data in Figure 1, and summaries in Figure 2 and 3 (with and without treatment)                                                                                           |
| Main results     | 16a | Give unadjusted estimates and, if applicable, confounder-adjusted estimates and their precision (eg, 95% confidence interval). Make clear which confounders were adjusted for and why they were included | Estimates given visually (Figure 4 + 5) and in text in “Dynamic antibiotic effect model” <b>(Results)</b>                                                                    |
|                  | 16b | Report category boundaries when continuous variables were categorized                                                                                                                                    | not applicable                                                                                                                                                               |

|                   |     |                                                                                                                                                                            |                                                                                   |
|-------------------|-----|----------------------------------------------------------------------------------------------------------------------------------------------------------------------------|-----------------------------------------------------------------------------------|
|                   | 16c | If relevant, consider translating estimates of relative risk into absolute risk for a meaningful time period                                                               | not applicable                                                                    |
| Other analysis    | 17  | Report other analyses done—eg analyses of subgroups and interactions, and sensitivity analyses                                                                             | Model comparison reported in “Dynamic antibiotic effect model” ( <b>Results</b> ) |
| Discussion        |     |                                                                                                                                                                            |                                                                                   |
| Key results       | 18  | Summarise key results with reference to study objectives                                                                                                                   | see <b>Discussion and Conclusion</b>                                              |
| Limitations       | 19  | Discuss limitations of the study, taking into account sources of potential bias or imprecision. Discuss both direction and magnitude of any potential bias                 | Limitation and potential bias discussed ( <b>Discussion and Conclusion</b> )      |
| Interpretation    | 20  | Give a cautious overall interpretation of results considering objectives, limitations, multiplicity of analyses, results from similar studies, and other relevant evidence | see <b>Discussion and Conclusion</b>                                              |
| Generalisability  | 21  | Discuss the generalisability (external validity) of the study results                                                                                                      | see <b>Discussion and Conclusion</b>                                              |
| Other information |     |                                                                                                                                                                            |                                                                                   |
| Funding           | 22  | Give the source of funding and the role of the funders for the present study and, if applicable, for the original study on which the present article is based              | Study funding given in Table 1 and in “Acknowledgements”                          |
