# Supplementary material for: Quantifying antibiotic impact on within-patient dynamics of extended-spectrum beta-lactamase resistance
Source: eLife journal article supplement (doi:10.7554/elife.49206), 2020-05-07
Supplement: repstand2 [file elife-49206-repstand2-v1.pdf]

| Item           | Number | STROBE-AMS Recommendation                                                                                                       | Addressed where                                                                                                                                                                                          |
|----------------|--------|---------------------------------------------------------------------------------------------------------------------------------|----------------------------------------------------------------------------------------------------------------------------------------------------------------------------------------------------------|
| Introduction   | 2      | Report previous clinical in vivo and in vitro studies                                                                           | Reported in <b>Introduction</b> and <b>Discussion and Conclusion</b>                                                                                                                                     |
| Objectives     | 3      | State specific objectives, including any prespecified hypotheses                                                                | See <b>Introduction</b>                                                                                                                                                                                  |
| <b>Methods</b> |        |                                                                                                                                 |                                                                                                                                                                                                          |
| Setting        | 5.1    | Describe if setting is epidemic or endemic (high, low, medium) for the study outcome                                            | High prevalence setting of ESBL-producing bacterial carriage (“Study participants and follow-up”, <b>Methods and Materials</b> )                                                                         |
|                | 5.2    | Specify type of hospital or unit and characteristics of population served by the healthcare setting                             | Medical and surgical wards, inpatients (“Study participants and follow-up”, <b>Methods and Materials</b> )                                                                                               |
|                | 5.3    | Describe antimicrobial formulary in use at the study location related to the analysed antibiotics                               | Ten most used antibiotics shown in Table 2, total number of antibiotics used, routes of administration and common antibiotic classes described in text (“Patient cohort and treatment”, <b>Results</b> ) |
|                | 5.4    | Describe infection control measures dedicated to the target resistant bacteria applied at the study location                    | No specific infection control measures targeting ESBL producing bacteria                                                                                                                                 |
| Participants   | 6a     | Cohort study—Give the eligibility criteria, the sources and methods of selection of participants. Describe methods of follow-up | see <b>Methods and Materials</b> under “Study participants and follow-up”                                                                                                                                |
|                | 6.1    | Define unit analysed (person, department or other)                                                                              | 2 wards from 3 hospitals (high ESBL                                                                                                                                                                      |

|           |     |                                                                                                                                                                                                   |                                                                                                                                                                                                                                                        |
|-----------|-----|---------------------------------------------------------------------------------------------------------------------------------------------------------------------------------------------------|--------------------------------------------------------------------------------------------------------------------------------------------------------------------------------------------------------------------------------------------------------|
|           |     |                                                                                                                                                                                                   | prevalence) representing within hospital population in similar settings (“Study participants and follow-up” in <b>Methods and Materials</b> ). Data was analysed per patient. No sub-analysis per ward due to limited number of patients               |
|           | 6.2 | Provide reasons (epidemiological and clinical) for choosing matching criteria                                                                                                                     | Not applicable                                                                                                                                                                                                                                         |
| Variables | 7.1 | Specify antimicrobial usage according to: type, dosage, duration and route of administration                                                                                                      | Antibiotic treatment was analysed by type, route and accounting for duration (“Dynamic within-host model”, <b>Methods and Materials</b> ). Dosage was not considered, see discussion of pharmacodynamic modelling ( <b>Discussion and Conclusion</b> ) |
|           | 7.2 | Provide information using defined daily dosages (DDDs) and, in addition, other definitions closer to local reality (packages, prescriptions). Provide justification for the measurement presented | see 7.1                                                                                                                                                                                                                                                |
|           | 7.3 | Address antimicrobial combinations                                                                                                                                                                | Multivariate dynamic model accounts for combinations. See also discussion of multiplicative effects ( <b>Discussion and Conclusion</b> )                                                                                                               |
|           | 7.4 | Explain rationale for grouping of antimicrobials                                                                                                                                                  | Grouping explained in “Association of antibiotic treatment                                                                                                                                                                                             |

|  |     |                                                                                                                                                                                                       |                                                                                                                                                                                                                                             |
|--|-----|-------------------------------------------------------------------------------------------------------------------------------------------------------------------------------------------------------|---------------------------------------------------------------------------------------------------------------------------------------------------------------------------------------------------------------------------------------------|
|  |     |                                                                                                                                                                                                       | and changes in resistance” ( <b>Methods and Materials</b> ). Antibiotics were considered individually in dynamic modelling (“Dynamic within-host model”, <b>Methods and Materials</b> )                                                     |
|  | 7.5 | Define time at risk for antimicrobial exposure and for resistance development                                                                                                                         | Study considered only within hospital treatment and pre-existing ESBL resistance                                                                                                                                                            |
|  | 7.6 | Include description of potential confounders (other than epidemiological variables)                                                                                                                   | Distribution of patients’ hospital origin, age and sex give (“Patient cohort and treatment”, <b>Results</b> )                                                                                                                               |
|  | 7.7 | Provide definition of resistance, multidrug resistance, including pattern of coresistance; whether studies performed to identify location or resistance eg, plasmid, chromosome, integron, transposon | ESBL resistance was identified phenotypically (“Identification of ESBL producing organism carriers”, <b>Methods and Materials</b> ) and detected genetically as bla <sub>CTX-M</sub> abundance. Co-resistance patterns were not established |
|  | 7.8 | Definition of infection and/or colonisation. If not a validated reference, provide evidence of robustness of the new definition                                                                       | Colonisation was identified as described in “Identification of ESBL producing organism carriers” ( <b>Methods and Materials</b> ). Only carriage, not infections were considered                                                            |

|                          |      |                                                                                                                                                    |                                                                                                                     |
|--------------------------|------|----------------------------------------------------------------------------------------------------------------------------------------------------|---------------------------------------------------------------------------------------------------------------------|
| Data sources/measurement | 8.1  | 8.1 Describe how antimicrobial consumption data were obtained (pharmacy, patients' charts, etc) and if it was actually used or purchased/dispensed | Antibiotic treatment data from patients' charts ("Study participants and follow-up", <b>Methods and Materials</b> ) |
| Quantitative variables   | 11.1 | Provide subgroup analyses for immunocompromised, surgical/medical patients and patients in intensive care units, if applicable                     | Stratification by ward (medical vs surgical) was not feasible due to limited number of patients                     |
| Results                  |      |                                                                                                                                                    |                                                                                                                     |
| Descriptive data         | 14.1 | Specify among the exposure: previous stay in long-term care facilities, nursing home and other healthcare settings                                 | No on prior hospitalisation available                                                                               |
| Other analysis           | 17.1 | Report subgroup analysis by type of patients and type of microorganism, if applicable                                                              | see 11.1                                                                                                            |
| Discussion               |      |                                                                                                                                                    |                                                                                                                     |
| Limitations              | 19.1 | Provide description of sources of selection bias, including infection control measures, audit and confounding                                      | Discussed in <b>Discussion and Conclusion</b>                                                                       |
| Generalisability         | 21.1 | Discuss study setting, type of hospital, local epidemiology for the generalisability                                                               | Discussed in <b>Discussion and Conclusion</b>                                                                       |
